# Supplementary material for: Influences of Anthropogenic Pollution on the Dynamics of Sedimentary Fulvic Acid Fractions as Revealed via Spectroscopic Techniques Combined with Two-Dimensional Correlation Spectroscopy
Source: MDPI journal article supplement (doi:10.3390/w15122256), 2023-06-16
Supplement: s1 [file s1]

## Supplementary Material

### **<sup>1</sup>Influences of anthropogenic pollution on dynamics of sedimentary fulvic acid fractions as revealed via spectroscopic techniques combined with two-dimensional correlation spectroscopy**

Yanchun Xiao<sup>a</sup>, Huibin Yu<sup>b\*</sup>, Yonghui Song<sup>b\*</sup>

a. Institute of Agricultural Engineering Technology, Fujian Academy of Agricultural Sciences,  
Fuzhou 350003, China

b. Watershed Research Center for Comprehensive Treatment of Water Environmental Pollution,  
Chinese Research Academy of Environmental Sciences, Beijing 100012, China

---

Corresponding author address: Watershed Research Center for Comprehensive Treatment of Water Environmental Pollution, Chinese Research Academy of Environmental Sciences, Beijing 100012, China. Tel./Fax: +86 10 84928380. E-mail address: songyh@craes.org.cn (Y.H. Song), yhbybx@163.com (H.B. Yu).

Table S1. Physicochemical properties of sediments, overlying bottom water, and sedimentary FA fractions from BR, China

| Number | Physicochemical parameter                                         | Data set | Minimum | Maximum | Mean    | Standard deviation (SD) | Coefficient of variation/% (CV) |
|--------|-------------------------------------------------------------------|----------|---------|---------|---------|-------------------------|---------------------------------|
| 1      | The pH of sediments                                               | 70       | 5.05    | 8.95    | 7.29    | 0.74                    | 10.15                           |
| 2      | The electrical conductivity (EC) of sediments                     | 70       | 60.95   | 1232.61 | 435.76  | 242.19                  | 55.58                           |
| 3      | The Dissolved oxygen (DO) concentration of overlying bottom water | 70       | 0.15    | 1.67    | 0.79    | 0.43                    | 54.43                           |
| 4      | The total nitrogen (TN) content of sediments[17]                  | 70       | 896.47  | 4381.85 | 2654.91 | 968.56                  | 36.48                           |
| 5      | The total phosphorus (TP) content of sediments[18]                | 70       | 307.78  | 3762.42 | 1550.01 | 938.25                  | 60.53                           |
|        | TN/TP                                                             | 70       | 0.50    | 12.82   | 2.63    | 2.40                    | 91.25                           |
| 6      | The total organic carbon(TOC) content of sedimentary FA fractions | 70       | 10.54   | 105.98  | 37.78   | 26.21                   | 69.38                           |

Table S2. Description of the six PARAFAC model components from the sedimentary FA fractions.

| Components | $E_x/E_m/nm$ | Probable source               | Peak             | References           |
|------------|--------------|-------------------------------|------------------|----------------------|
| C1         | 225/380      | Tryptophan-like               | TRL              | 225–237/340–381 [29] |
| C2         | 285/390      | Microbial humic-like          | MHL              | 290–310/370–410 [34] |
| C3         | 260/470      | Soil-derived fulvic acid-like | FAL <sub>1</sub> | 260 (345) /476 [35]  |
| C4         | 240/435      | UV fulvic acid-like           | FAL <sub>2</sub> | <260/435–460 [34]    |
| C5         | 335/420      | Visible fulvic acid-like      | FAL <sub>3</sub> | 320–360/420–460 [34] |
| C6         | 360/480      | Terrestrial humic acid-like   | HAL              | 260–380/480 [13]     |

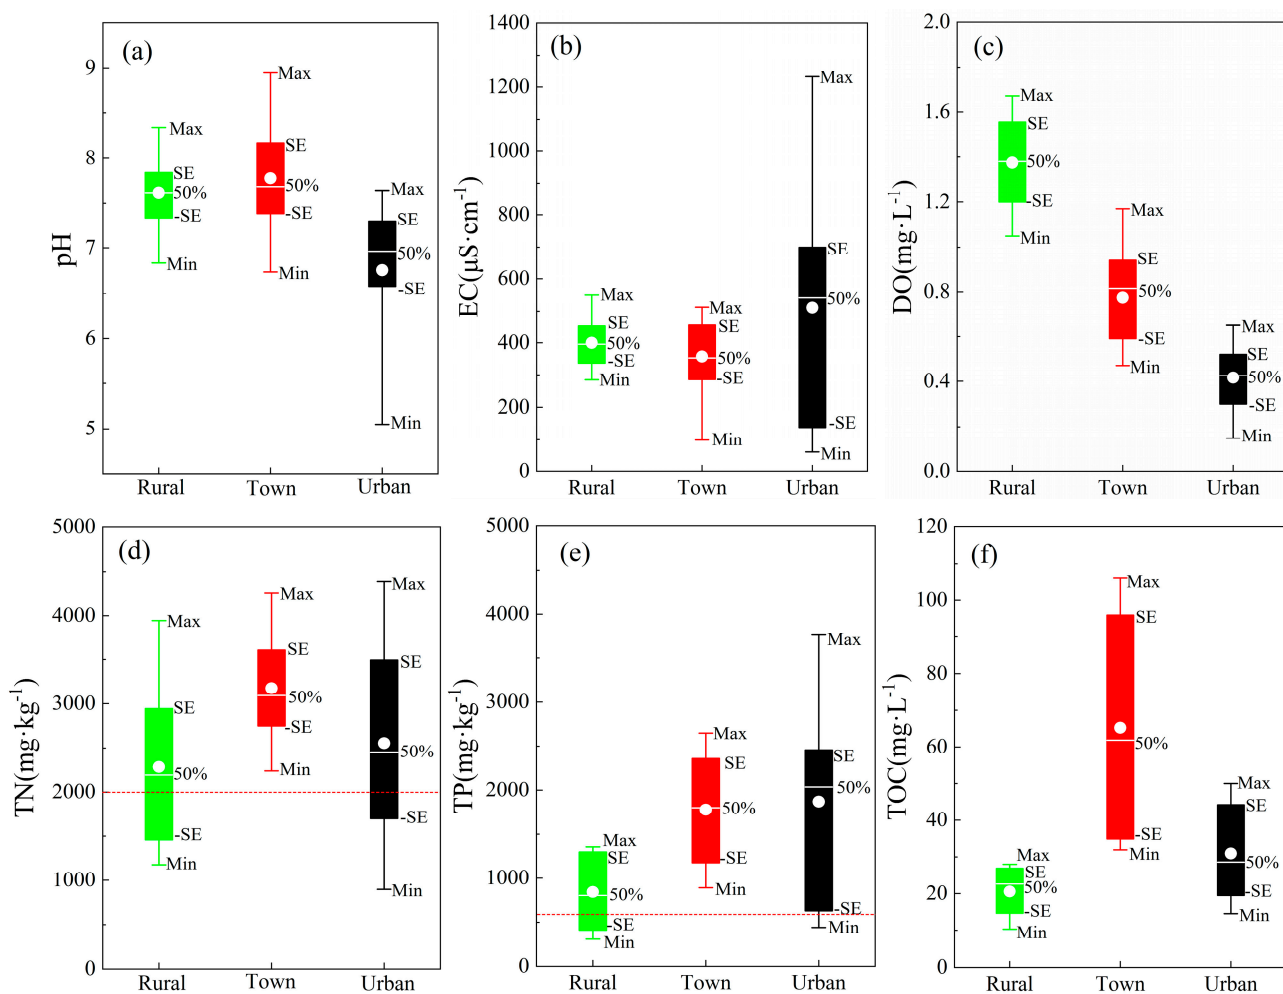

Figure S1. Boxplots display the spatial variation of physicochemical parameters. White circles indicate the mean values, boxes show standard error, and whiskers delimit maximum and minimum.

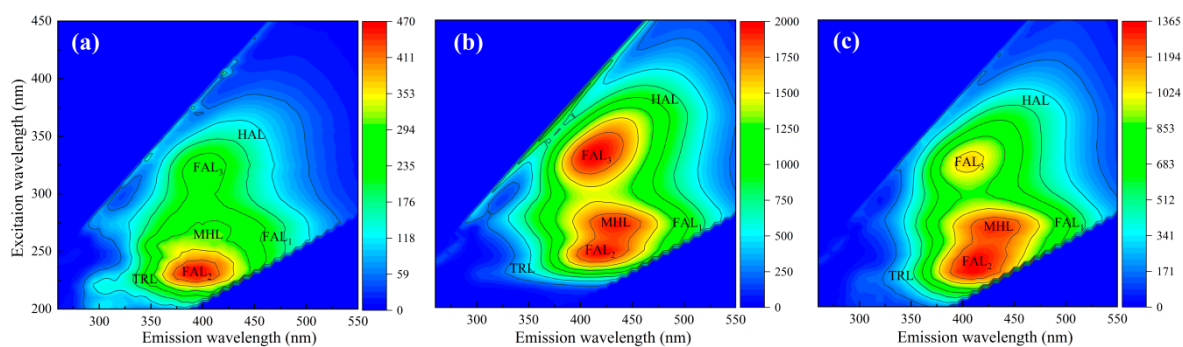

Figure S2. Representative EEM of sedimentary FA fractions with various pollution types and sources: (a) agricultural effluent (S1); (b) industrial effluent (S8); and (c) untreated sewage effluent (S13).

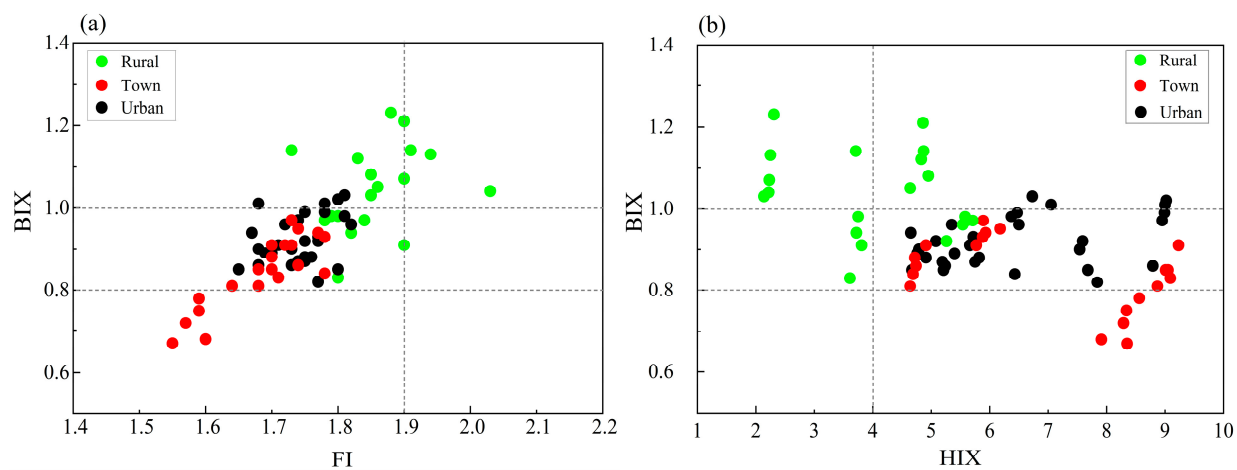

Figure S3. Spatial variations of the values of FI, BIX and HIX.
